# Supplementary material
Source: publisher site journal article supplement (https://www.e-cmh.org/upload/media/cmh-2022-0316-Supplementary-Fig-39.pdf)
Supplement: Supplementary file 1 [file cmh-2022-0316-Supplementary-Fig-39.pdf]

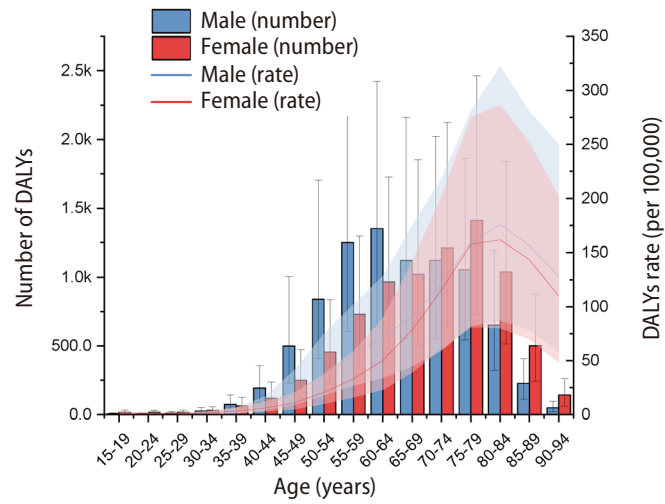

**Supplementary Figure 39.** Number and DALY rate of liver cancer due to NASH/NAFLD in the Republic of Korea in 2019. DALY, disease-adjusted life year; NASH, non-alcoholic steatohepatitis; NAFLD, non-alcoholic fatty liver disease.
